# Supplementary material for: MicroRNA-705 regulates the differentiation of mouse mandible bone marrow mesenchymal stem cells
Source: PeerJ. 2019 Jan 10;7:e6279. doi: 10.7717/peerj.6279 (PMC6330203; doi:10.7717/peerj.6279)
Supplement: Data S2 — Row data of statistical comparisons were shown in the Sheets conresponding to each figure. [file peerj-07-6279-s003.xlsx]

## Sheet: Fig1
Fig. 1b
	Femur Comparison
		BMD(mg/cm^2)	BMD.SD
	Sham	165	9.154
	OVX	121	11.2421
Fig. 1c
	Femur Comparison
		BV/TV	BV/TV.SD
	Sham	0.35	0.0154
	OVX	0.18	0.0223
Fig. 1d
	Mandible Comparison
		BMD(mg/cm^2)	BMD.SD
	Sham	134	8.9173
	OVX	105	9.0252
Fig. 1e
	Mandible Comparison
		BV/TV	BV/TV.SD
	Sham	0.746	0.0183
	OVX	0.519	0.0293
	n=10

## Sheet: Fig2
	Fig. 2b				Fig. 2c and Fig.2d
	Absoebance (570 nm)				Osteogenesis Mark Genes Expression
		Relative Quantity	Relative Quantity SD				Relative Quantity	Relative Quantity SD
	Sham	1	0.1559		RUNX2	Sham	1	0.1075
	OVX	0.41	0.167			OVX	0.6145	0.0516
					ALP	Sham	1	0.1308
						OVX	0.22	0.0453
	Fig. 2f				Fig. 2g and Fig.2h
	Absoebance (520 nm)				Adipogenesis Mark Genes Expression
		Relative Quantity	Relative Quantity SD				Relative Quantity	Relative Quantity SD
	Sham	1	0.1072		LPL	Sham	1	0.17368
	OVX	1.85	0.1846			OVX	3.7388	0.199
					PPAR-γ	Sham	1	0.209
						OVX	2.6074	0.1197
	n=6

## Sheet: Fig3
Fig. 3a
	miR-705 expression in Sham and OVX Mandible MSCs
		Relative Quantity	Relative Quantity SD
	Sham	1	0.1315
	OVX	1.78	0.1807
Fig. 3b
	Expression level of miR-705 during different time point of osteogenic induction
		Relative Quantity	Relative Quantity SD
	0 Day	1	0.2156
	3 Day	0.54	0.1309
	7 Day	0.21	0.087
Fig. 3c
	Expression level of miR-705 during different time point of adipogenic induction
		Relative Quantity	Relative Quantity SD
	0 Day	1	0.1461
	3 Day	1.77	0.3287
	7 Day	3.203	0.1755
	n=6

## Sheet: Fig4
	Fig. 4d
	Absoebance (570nm)
		Relative Quantity	Relative Quantity SD
	Control/MSC	1	0.041
	miR705-mimics	0.65	0.051
	miR705-inhibitor	1.24	0.039
	Fig. 4e and 4f
	Expression of RUNX2 and ALP in MSCs
			Relative Quantity	Relative Quantity SD
	ALP	Control/MSC	1	0.05071
		miR705-mimics	0.55	0.07
		miR705-inhibitor	1.363	0.0824
	RUNX2	Control/MSC	1	0.0626
		miR705-mimics	0.7182	0.0823
		miR705-inhibitor	1.23	0.104
	n=6

## Sheet: Fig5
	Fig. 5d
	Absoebance (520nm)
		Relative Quantity	Relative Quantity SD
	Control/MSC	1	0.0834
	miR705-mimics	1.8835	0.173
	miR705-inhibitor	0.708	0.0294
	Fig. 5e and 5f
	Expression of PPARγ and LPL in MSCs
			Relative Quantity	Relative Quantity SD
	LPL	Control/MSC	1	0.0804
		miR705-mimics	1.742	0.0715
		miR705-inhibitor	0.595	0.107
	PPAR-γ	Control/MSC	1	0.134
		miR705-mimics	1.47	0.1096
		miR705-inhibitor	0.6421	0.062
	n=6

## Sheet: Fig6
	Fig. 6d
	Absoebance (570nm)
		Relative Quantity	Relative Quantity SD
	Control/Sham	1	0.041
	Control/OVX	0.491	0.0916
	OVX/miR705-inhibitor	0.697	0.0742
	Fig. 6e and 6f
	Expression of RUNX2 and ALP in MSCs
			Relative Quantity	Relative Quantity SD
	RUNX2	Control/Sham	1	0.0541
		Control/OVX	0.419	0.0767
		OVX/miR705-Inhibitor	0.645	0.0403
	ALP	Control/Sham	1	0.071
		Control/OVX	0.582	0.055
		OVX/miR705-Inhibitor	0.786	0.0306
	n=6

## Sheet: Fig7
	Fig. 7d
	Absoebance (520nm)
		Relative Quantity	Relative Quantity SD
	Control/Sham	1	0.1034
	Control/OVX	2.211	0.156
	OVX/miR705-inhibitor	1.721	0.0927
	Fig. 7e and 7f
	Expression of PPARγ and LPL in MSCs
			Relative Quantity	Relative Quantity SD
	PPAR-γ	Control/Sham	1	0.229
		Control/OVX	9.408	2.071
		OVX/miR705-inhibitor	5.031	1.142
	LPL	Control/Sham	1	0.189
		Control/OVX	10.2602	2.092
		miR705-Inhibitor	5.492	1.053
	n=6

## Sheet: Fig8
		Fig. 8
		Expression of miRNA-705 in MSCs for 48hours
				Relative Quantity	Relative Quantity SD
			Control/Sham	1	0.023
			Control/OVX	1.567	0.114
			OVX/miR705-inhibitor	0.5323	0.131
		n=6

## Sheet: Sup Fig1
Supplemental Fig. 1a
	Mir705 expression at 14-day of osteogenesis induction
		Relative Quantity	Relative Quantity SD
	Control/MSCs	1	0.17
	miR705-mimics	24.6	0.77
	miR705-inhibitor	0.52	0.12
Supplemental Fig. 1b
	Mir705 expression at 7-day of adipogenesis induction
		Relative Quantity	Relative Quantity SD
	Control/MSCs	1	0.11
	miR705-mimics	18.196	0.91
	miR705-inhibitor	0.757	0.073
	n=6
